# Supplementary material for: Modelling regional glacier length changes over the last millennium using the Open Global Glacier Model
Source: Copernicus journal article supplement (doi:10.5194/tc-14-3135-2020), 2020-09-16

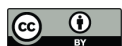

*Supplement of*

## **Modelling regional glacier length changes over the last millennium using the Open Global Glacier Model**

**David Parkes and Hugues Goosse**

*Correspondence to:* David Parkes ([david.parkes.88@gmail.com](mailto:david.parkes.88@gmail.com))

The copyright of individual parts of the supplement might differ from the CC BY 4.0 License.

## Supplementary material

In tables S1-4, the values of relative variance (RV), shown in main figure 6, are categorised.  $0 \leq RV \leq 0.4$  is labelled 'minimal' explanation of the full variance. For  $0.4 < RV \leq 0.8$  the variable provides a 'moderate' explanation of the full variance.  $0.8 < RV \leq 1.2$ , the bracket around the value of 1 which indicates the same variance as in the full runs, is labelled a 'full' explanation, comparable to the full run. When  $RV > 1.2$ , the single-variable-driven run shows greater variability than the full-climate-driven, and we consider the explanation of the full variance by that single variable to 'overshoot' the full-climate-driven output.

| Region         | Minimal (0 - 0.4) | Moderate (0.4 - 0.8) | Full (0.8 - 1.2) | Overshoot (1.2+) |
|----------------|-------------------|----------------------|------------------|------------------|
| Alaska         | 0                 | 0                    | 2                | 4                |
| W. Can/US      | 0                 | 1                    | 5                | 0                |
| Greenland Per. | 0                 | 0                    | 1                | 5                |
| Iceland        | 0                 | 0                    | 1                | 5                |
| Svalbard       | 0                 | 0                    | 2                | 4                |
| Scandinavia    | 0                 | 2                    | 2                | 2                |
| Rus. Arctic    | 0                 | 2                    | 2                | 2                |
| North Asia     | 0                 | 1                    | 1                | 4                |
| Cen. Europe    | 0                 | 1                    | 4                | 1                |
| Cauc./M.East   | 0                 | 0                    | 4                | 2                |
| Cen. Asia      | 0                 | 6                    | 0                | 0                |
| S Asia West    | 1                 | 0                    | 4                | 1                |
| S Asia East    | 0                 | 0                    | 2                | 4                |
| Low Latitudes  | 0                 | 0                    | 6                | 0                |
| S Andes        | 0                 | 0                    | 5                | 1                |
| New Zealand    | 0                 | 1                    | 3                | 2                |
| Global         | 1                 | 14                   | 44               | 37               |

**Table S1:** Explanation of variance by temperature in each region

| Region         | Minimal (0 - 0.4) | Moderate (0.4 - 0.8) | Full (0.8 - 1.2) | Overshoot (1.2+) |
|----------------|-------------------|----------------------|------------------|------------------|
| Alaska         | 6                 | 0                    | 0                | 0                |
| W. Can/US      | 6                 | 0                    | 0                | 0                |
| Greenland Per. | 6                 | 0                    | 0                | 0                |
| Iceland        | 5                 | 0                    | 0                | 1                |
| Svalbard       | 2                 | 0                    | 2                | 1                |
| Scandinavia    | 4                 | 1                    | 0                | 1                |
| Rus. Arctic    | 1                 | 2                    | 0                | 3                |
| North Asia     | 5                 | 1                    | 0                | 0                |
| Cen. Europe    | 6                 | 0                    | 0                | 0                |
| Cauc./M.East   | 6                 | 0                    | 0                | 0                |
| Cen. Asia      | 5                 | 0                    | 0                | 1                |
| S Asia West    | 0                 | 0                    | 4                | 2                |
| S Asia East    | 2                 | 1                    | 3                | 0                |
| Low Latitudes  | 6                 | 0                    | 0                | 0                |
| S Andes        | 6                 | 0                    | 0                | 0                |
| New Zealand    | 6                 | 0                    | 0                | 0                |
| Global         | 72                | 5                    | 9                | 9                |

**Table S2:** Explanation of variance by precipitation in each region. NOTE: Svalbard features a failure in the modelling of the constant temperature run (used to determine explanation of variance by precipitation) for BCC-CSM, resulting in one fewer result in this region.

| Model   | Minimal (0 - 0.4) | Moderate (0.4 - 0.8) | Full (0.8 - 1.2) | Overshoot (1.2+) |
|---------|-------------------|----------------------|------------------|------------------|
| CESM    | 1                 | 3                    | 6                | 6                |
| IPSL    | 0                 | 2                    | 7                | 7                |
| GISS    | 0                 | 1                    | 7                | 8                |
| CCSM4   | 0                 | 4                    | 7                | 5                |
| BCC-CSM | 0                 | 2                    | 8                | 6                |
| MPI     | 0                 | 2                    | 9                | 5                |

**Table S3:** Explanation of variance by temperature in each model

| Model   | Minimal (0 - 0.4) | Moderate (0.4 - 0.8) | Full (0.8 - 1.2) | Overshoot (1.2+) |
|---------|-------------------|----------------------|------------------|------------------|
| CESM    | 12                | 1                    | 3                | 0                |
| IPSL    | 12                | 1                    | 1                | 2                |
| GISS    | 14                | 0                    | 1                | 1                |
| CCSM4   | 12                | 0                    | 1                | 3                |
| BCC-CSM | 11                | 2                    | 1                | 1                |
| MPI     | 11                | 1                    | 2                | 2                |

**Table S4:** Explanation of variance by precipitation in each model. NOTE: Svalbard features a failure in the modelling of the constant temperature run (used to determine explanation of variance by precipitation) for BCC-CSM, resulting in one fewer result for this model.

**Figures S1-5:** On the following pages: regional length changes for each of the 5 GCMs not featured in the main text figure 8 (CESM, GISS, CCSM4, BCC-CSM, and MPI, in order) comparing fully climate run and constant precipitation run, shown with relative precipitation (annual precipitation normalised to 1900-1950 mean climate). The constant precipitation run lengths are normalised to the full climate run 1950 length, to better illustrate differences.

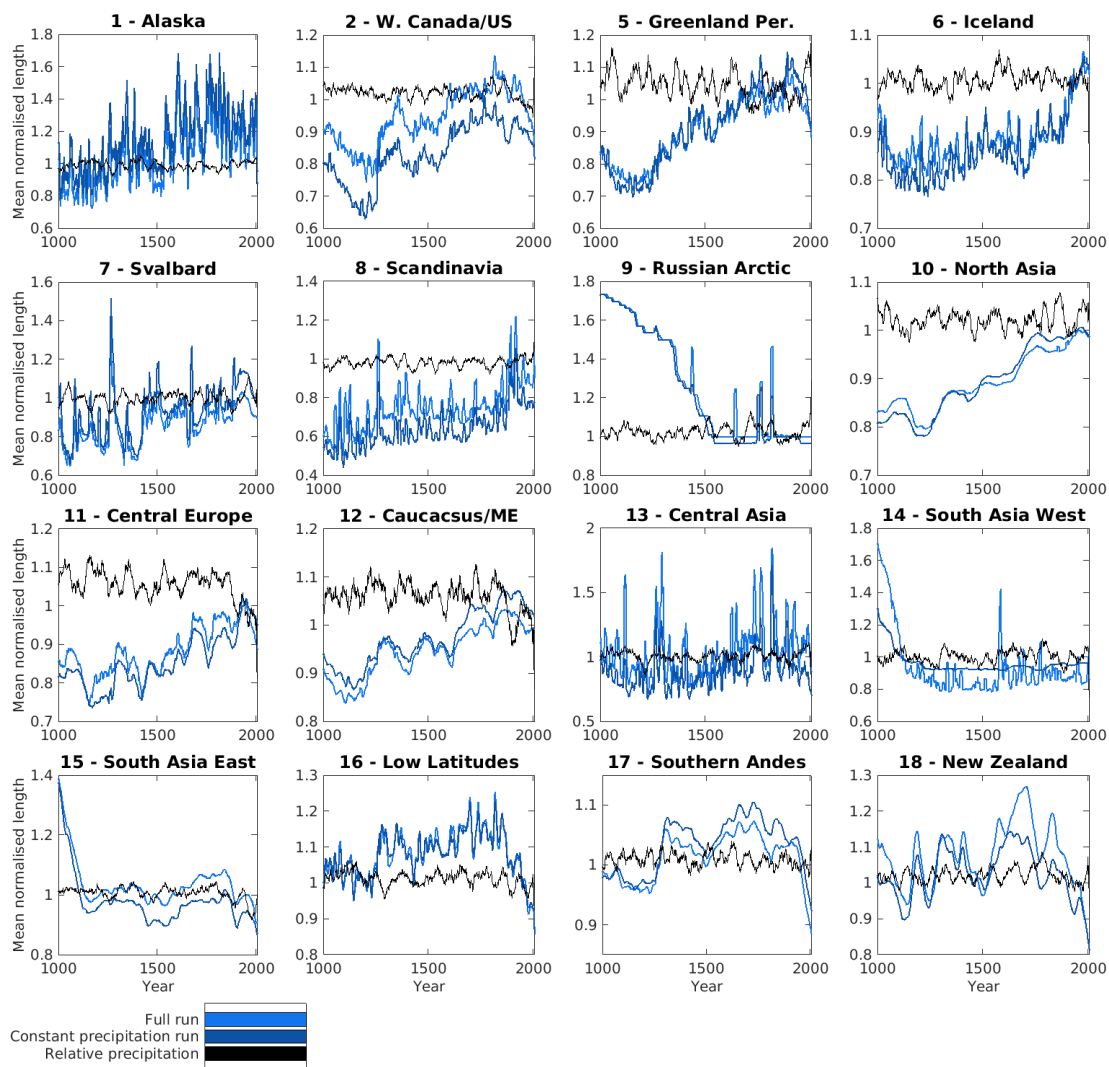

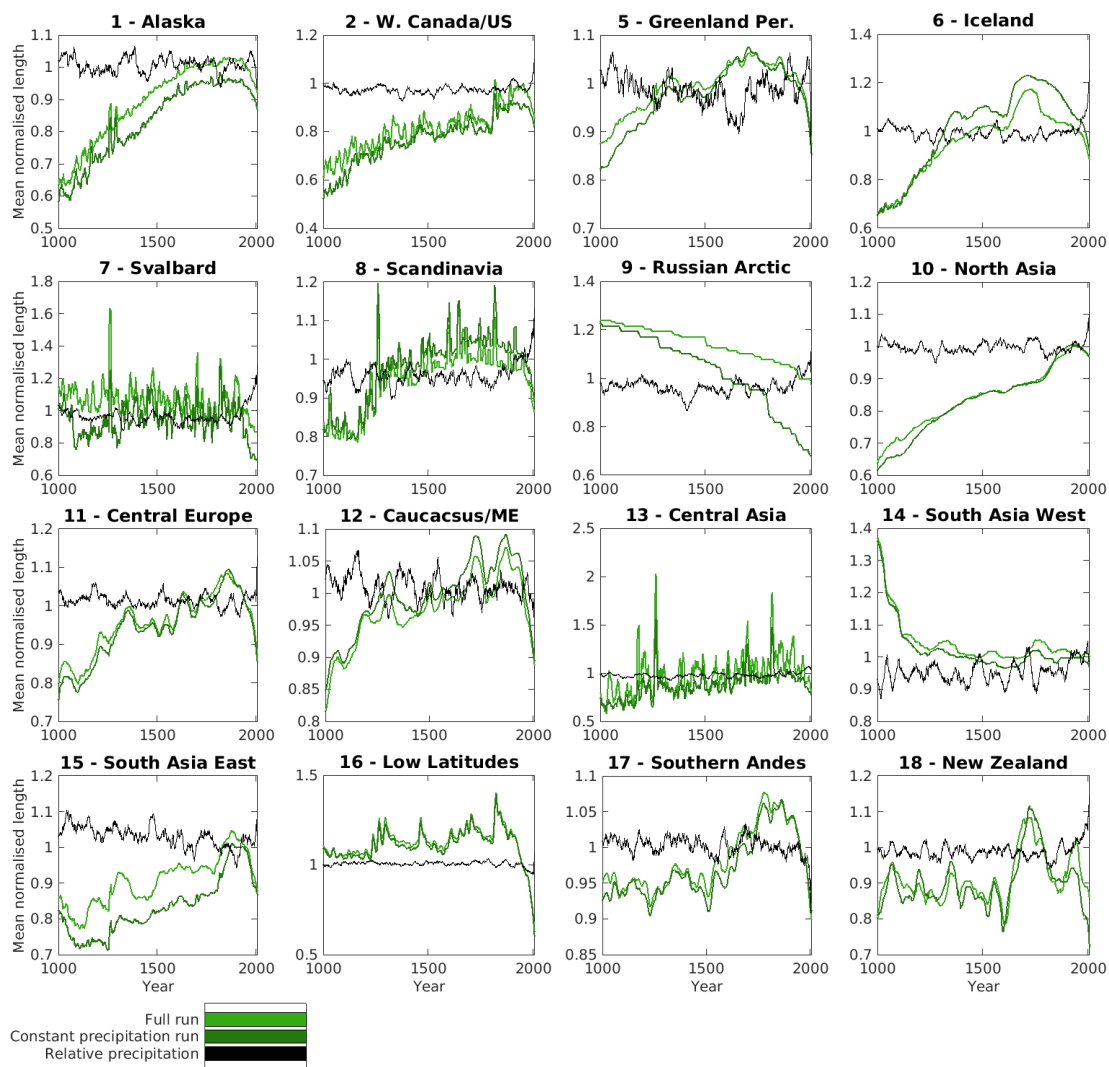

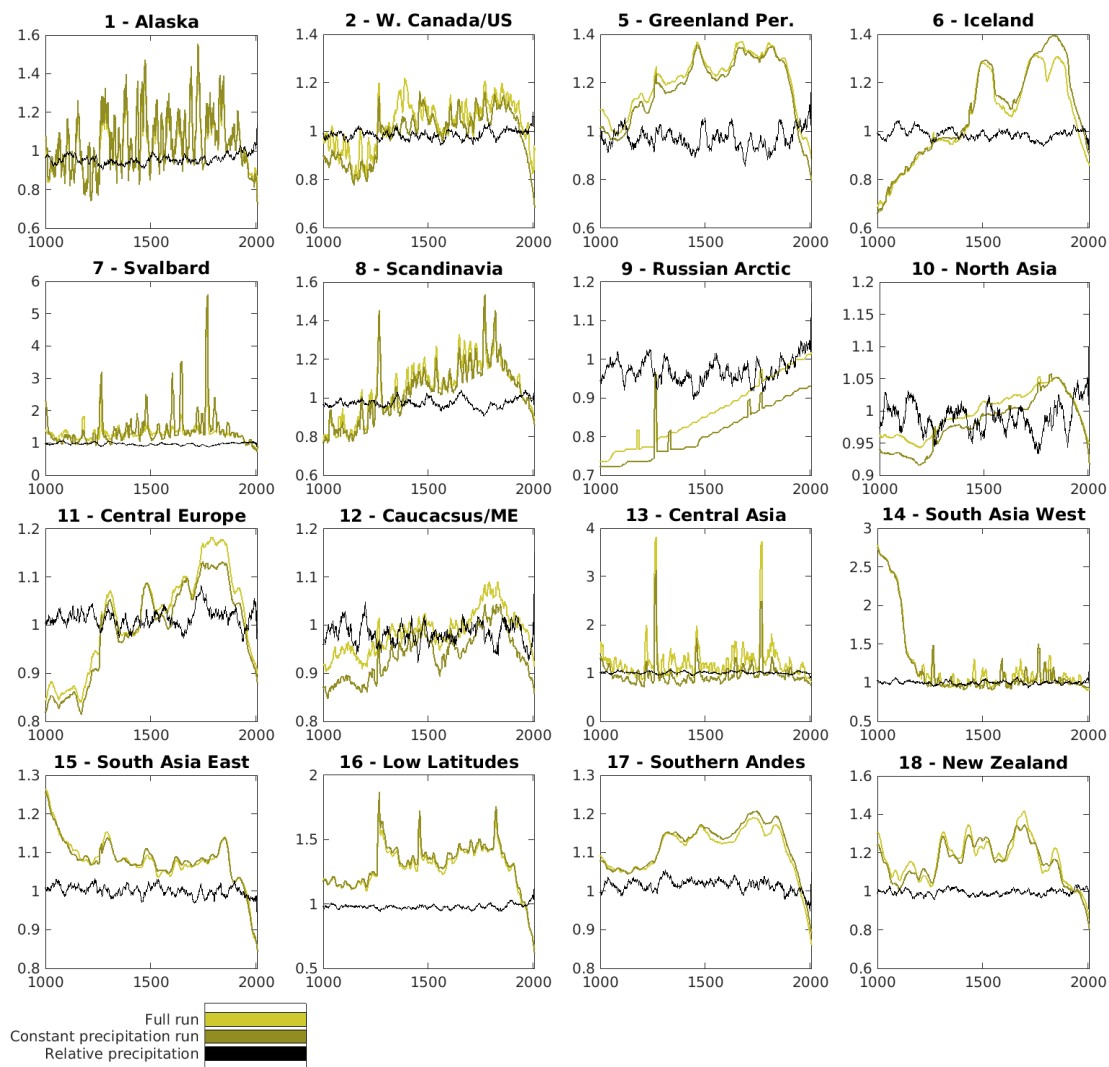

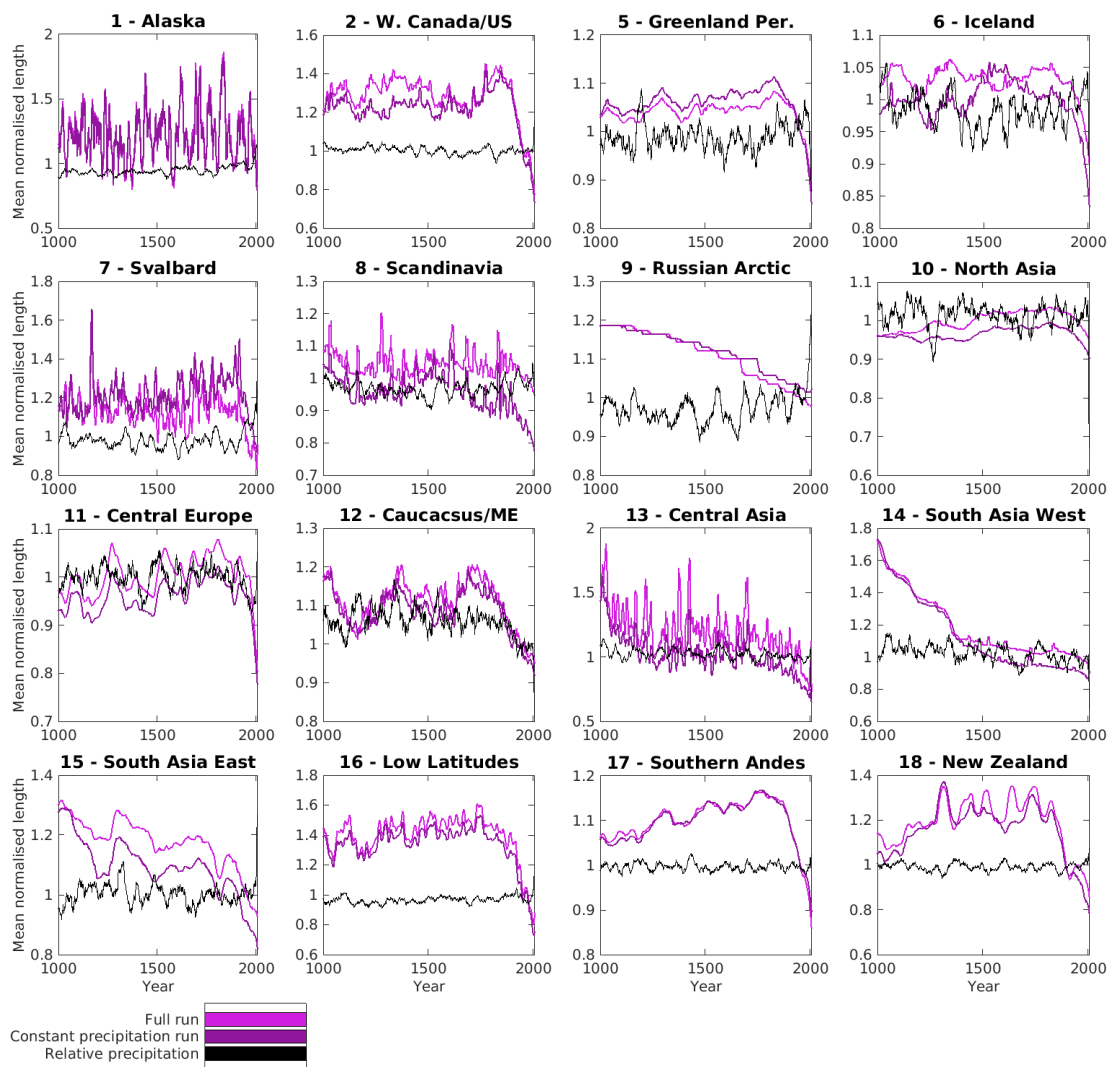



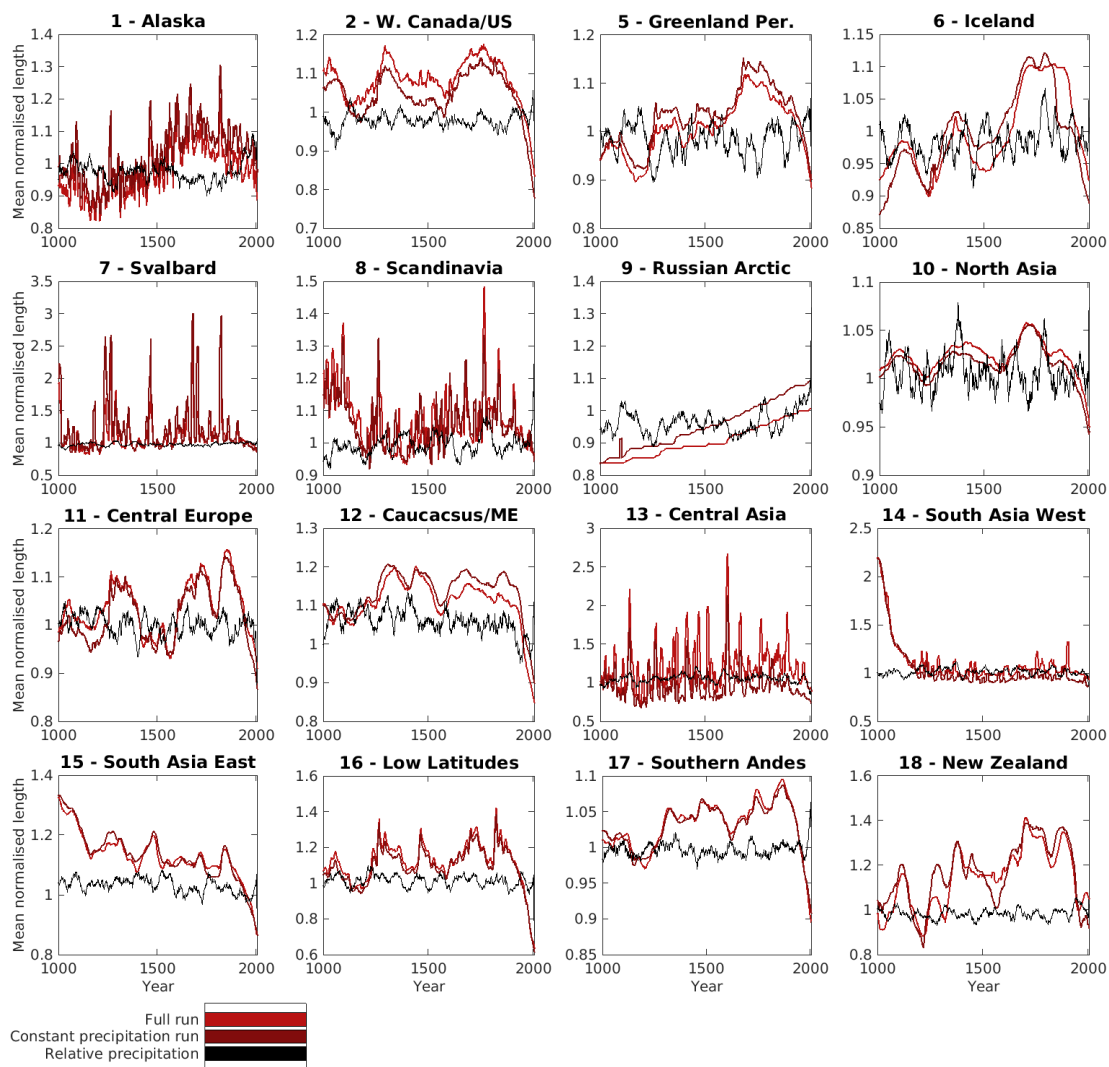

**Figures S6-10:** On the following pages: regional length changes for each of the 5 GCMs not featured in the main text figure 9 (CESM, GISS, CCSM4, BCC-CSM, and MPI, in order) comparing fully climate run and constant temperature run, shown with relative melt-relevant temperature (annual degree-day sum normalised to 1900-1950 mean climate). Relative temperature is inverted, so that the direction of any trend corresponds to the expected impact on glacier length. The constant temperature run lengths are normalised to the full climate run 1950 length, to better illustrate differences.

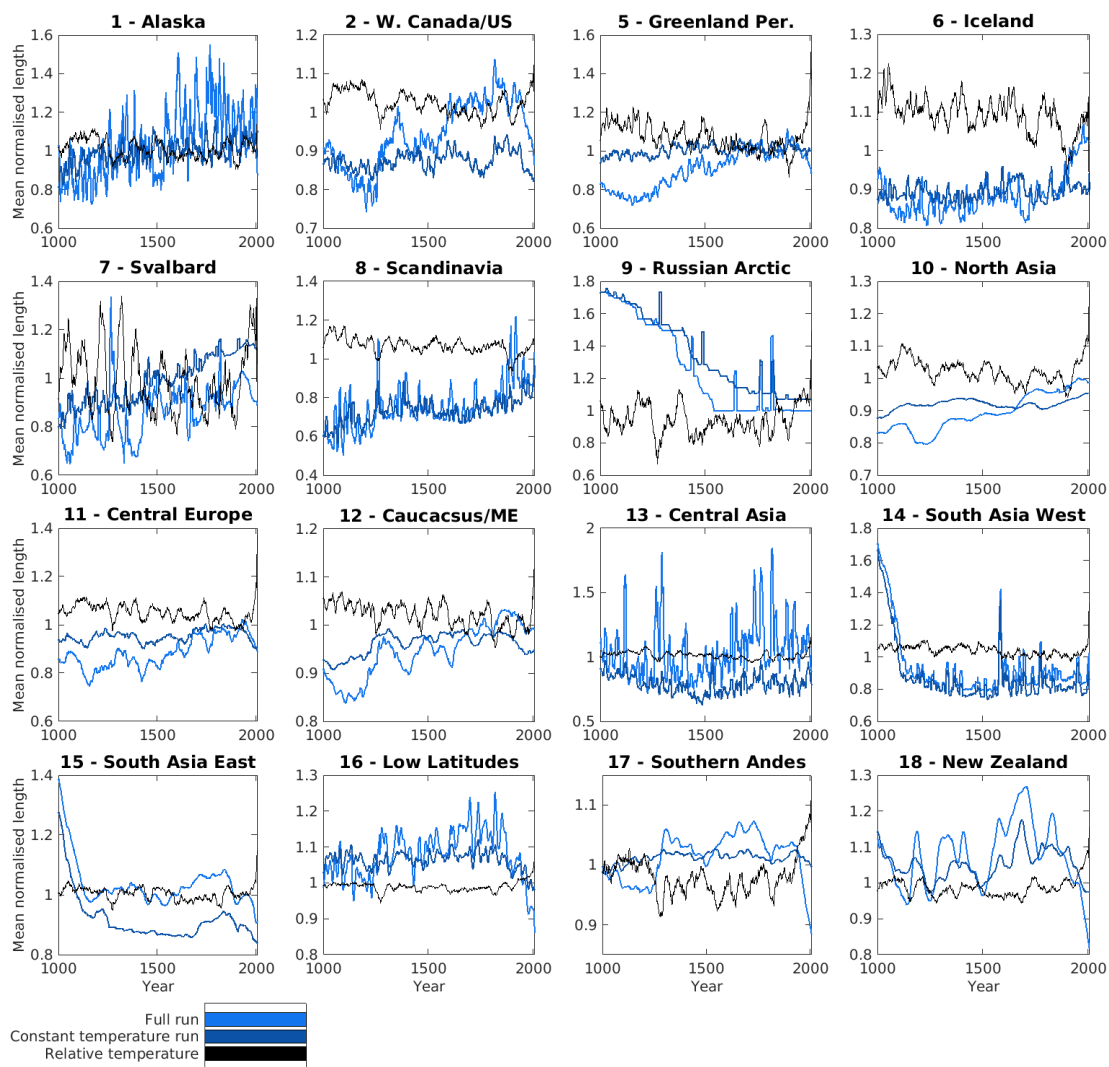

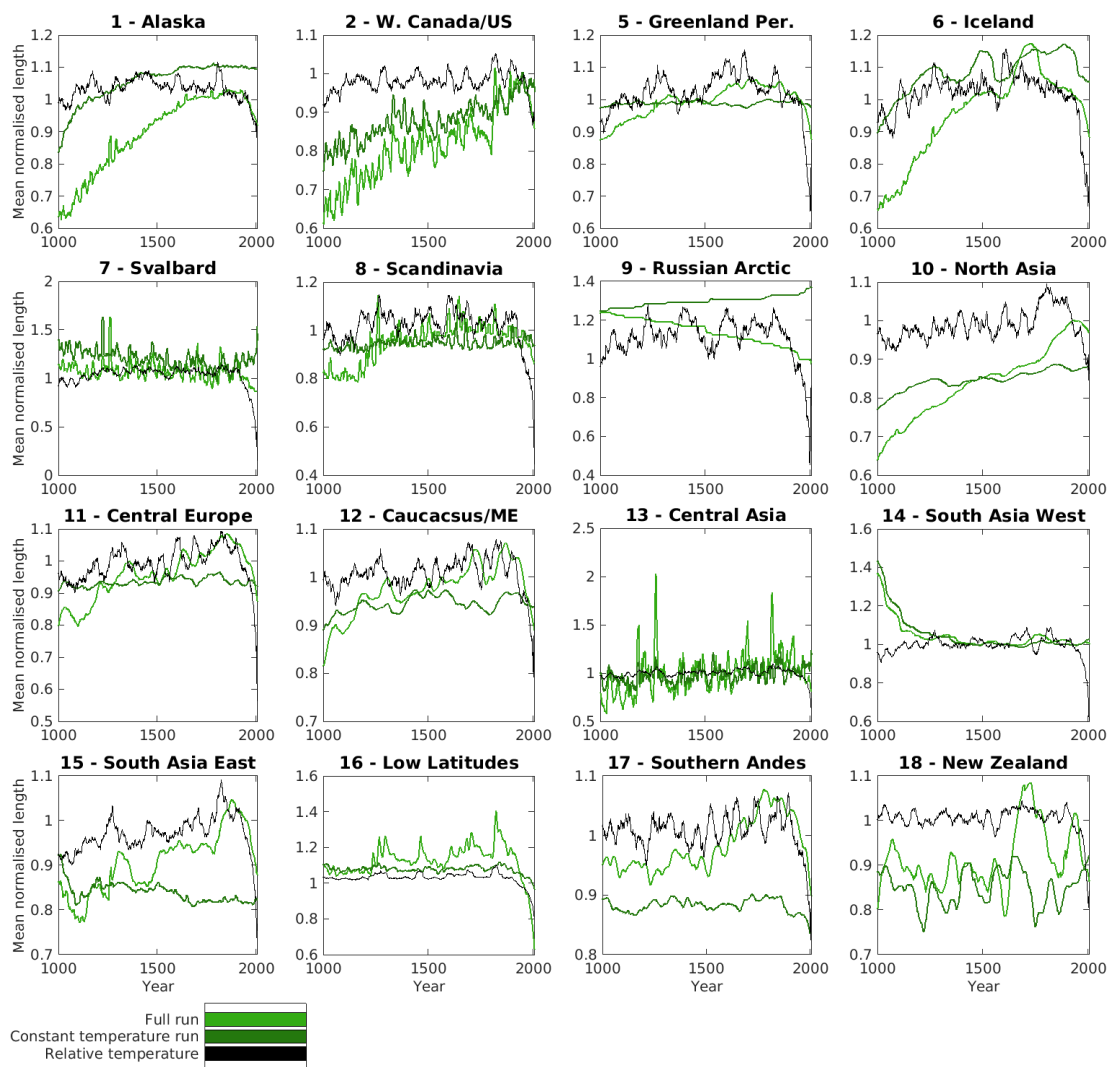

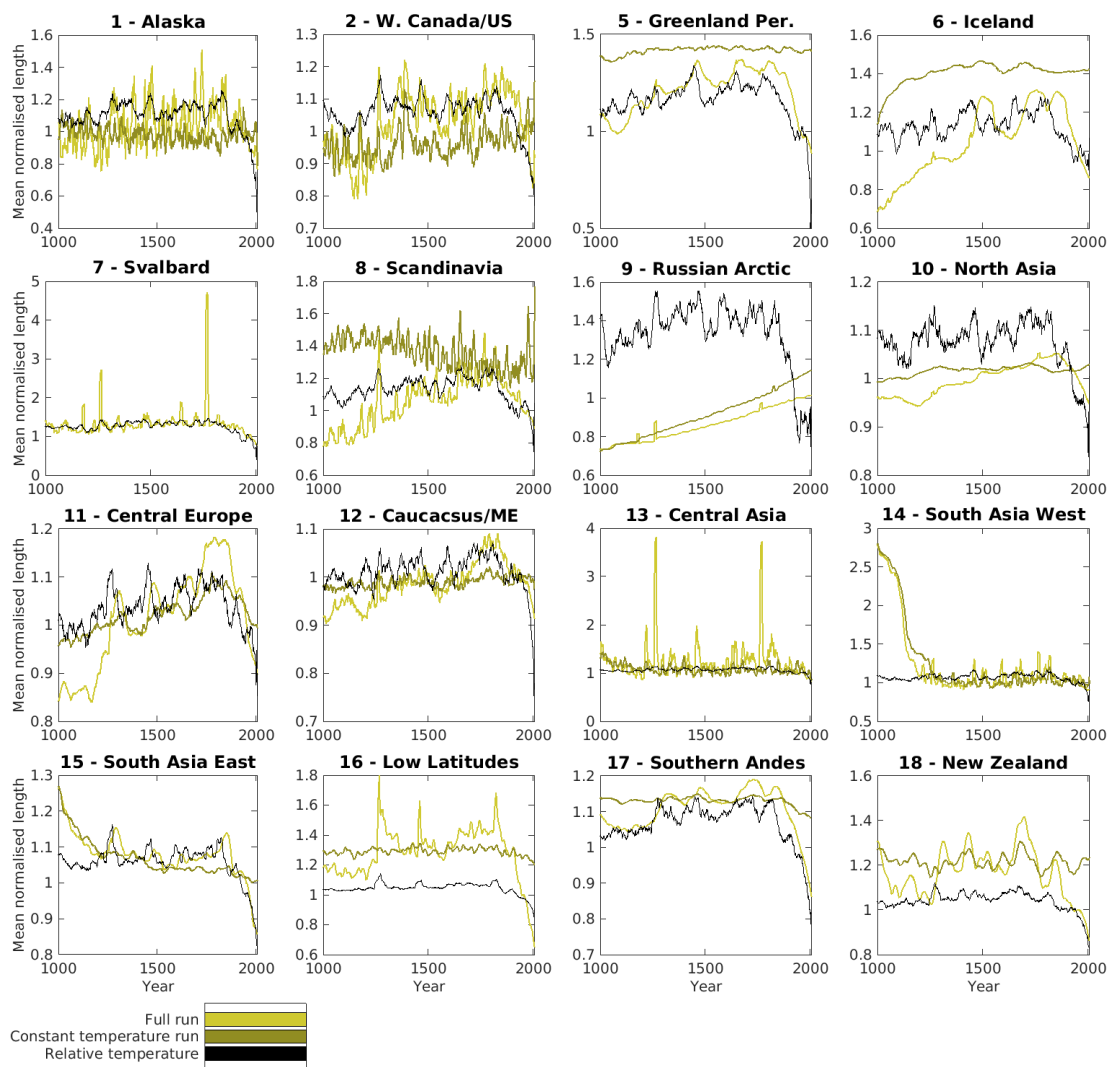

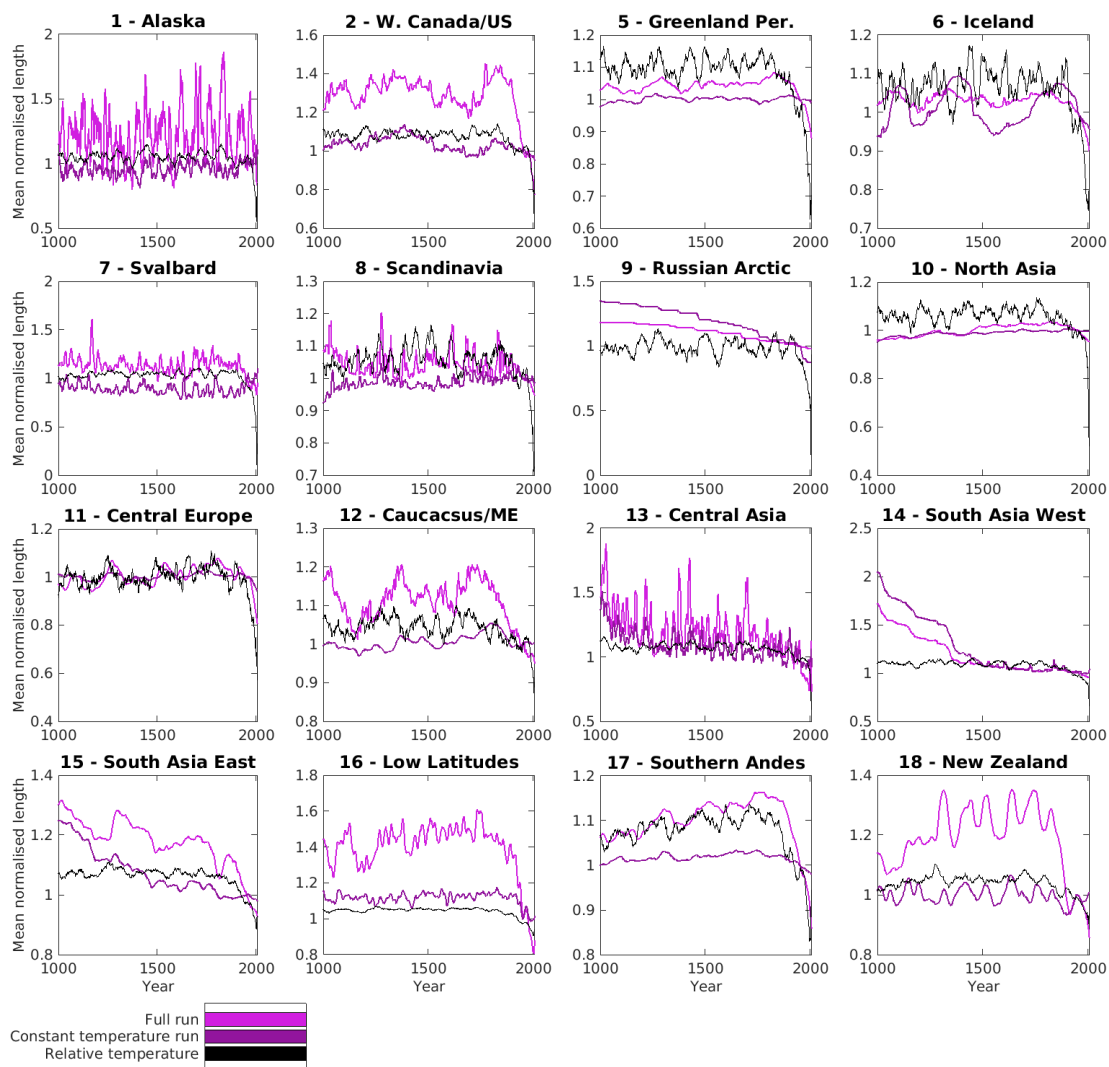

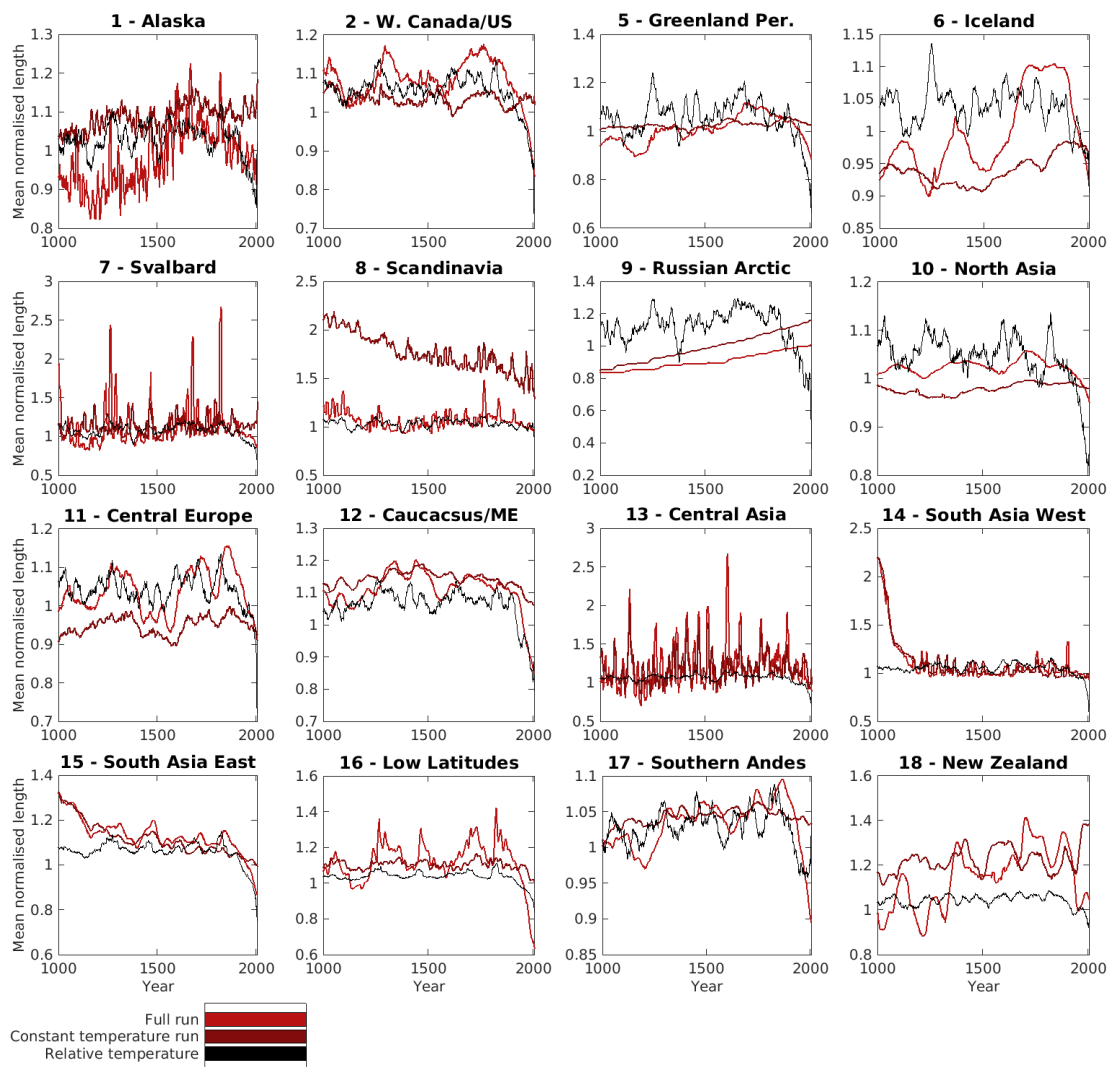

**Figures S11-16:** On the following pages: the spread of 1950-normalised length changes for all glaciers in each region for each of the 6 GCMs (CESM, IPSL, GISS, CCSM4, BCC-CSM, and MPI, in order).



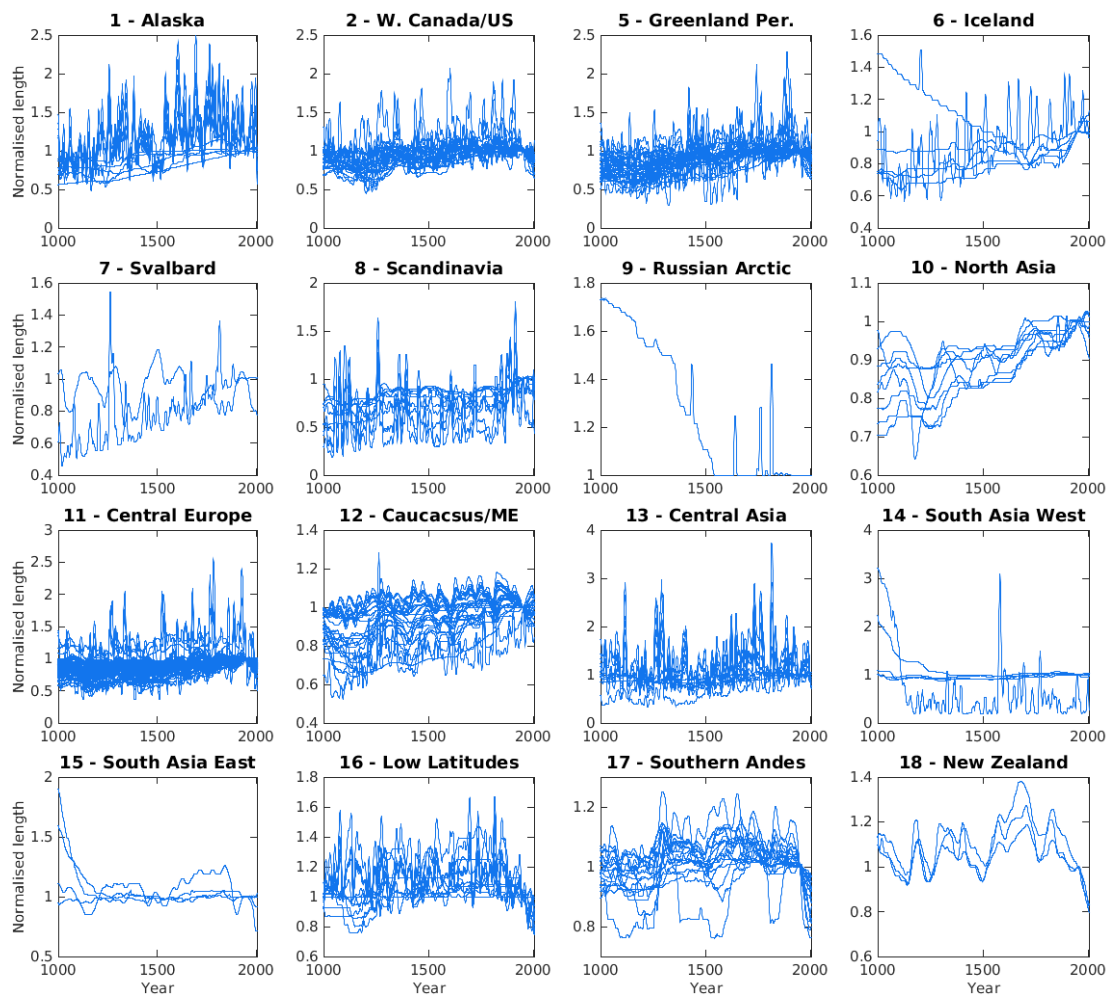

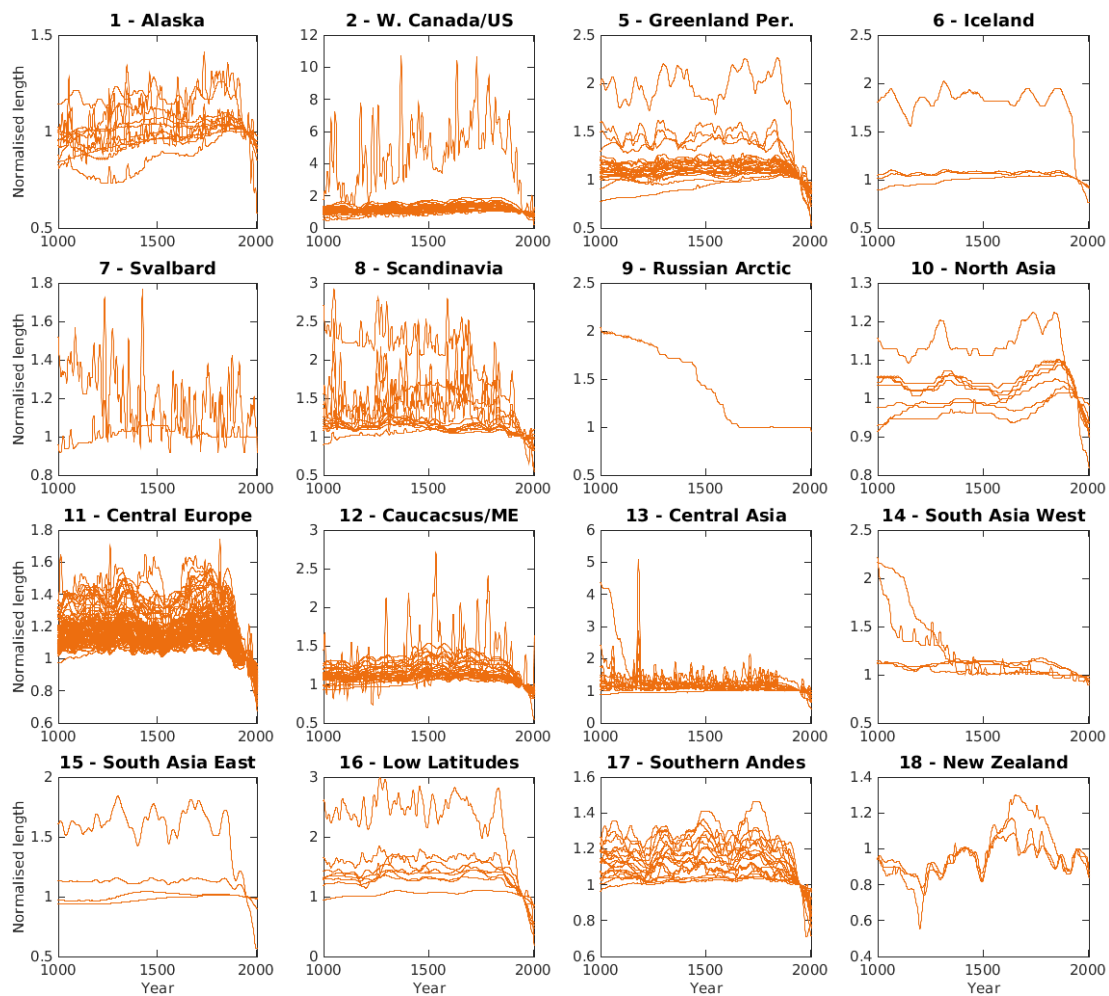

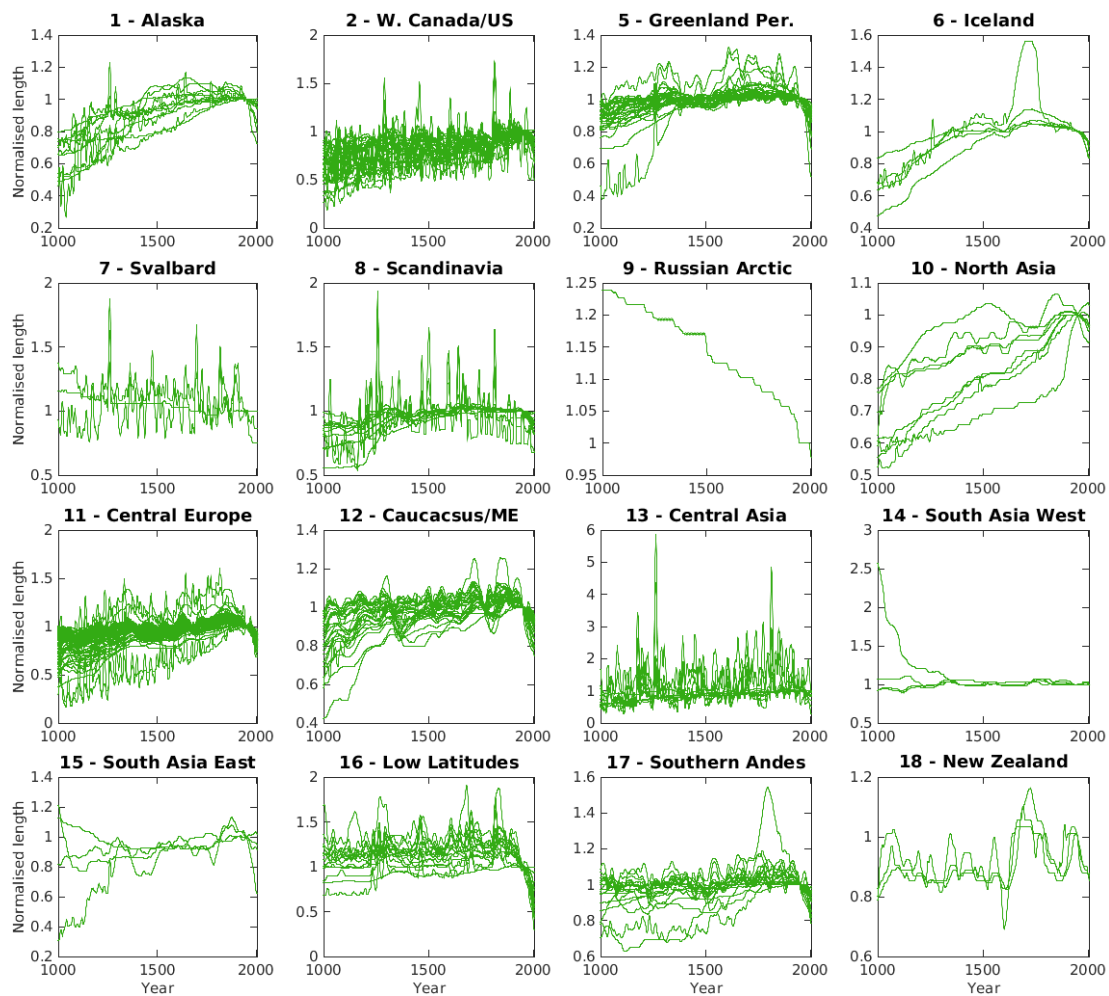

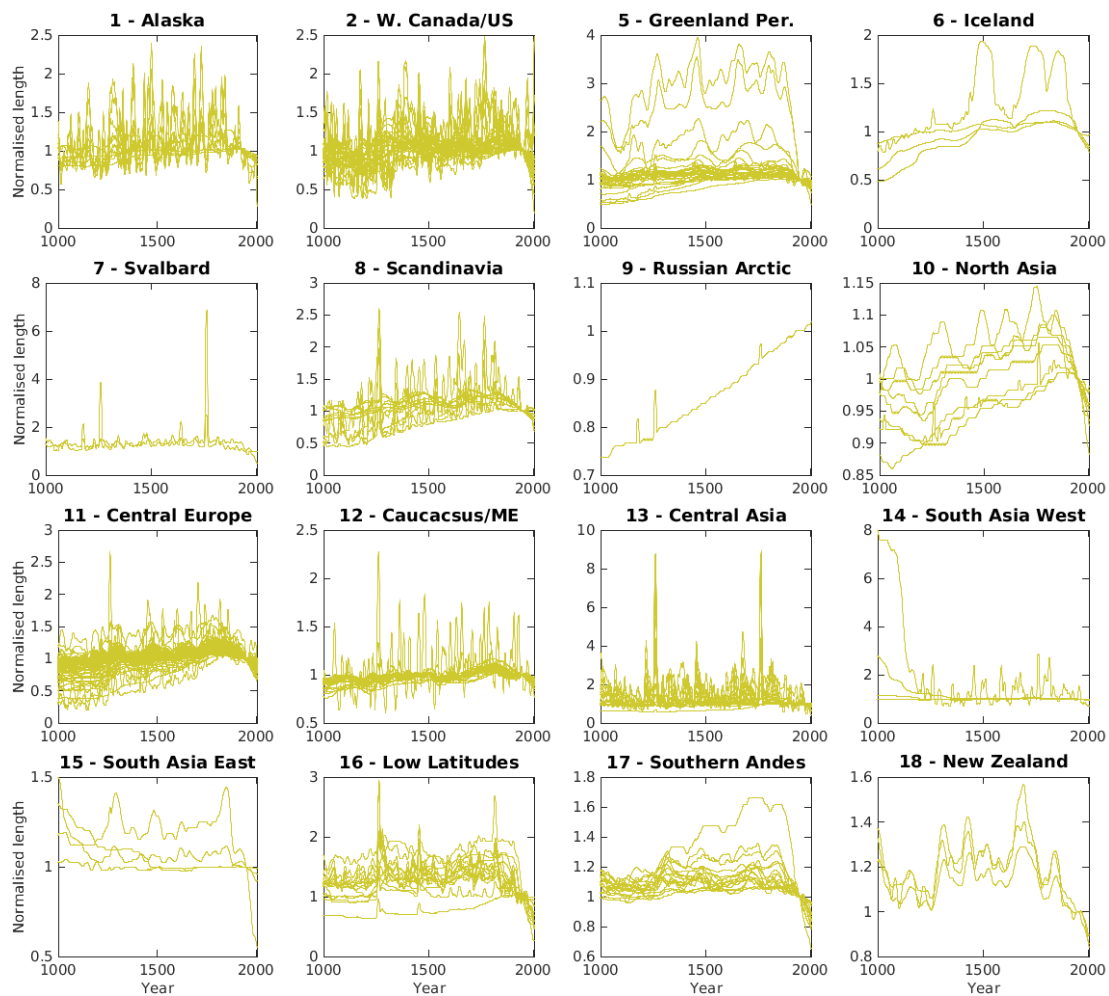

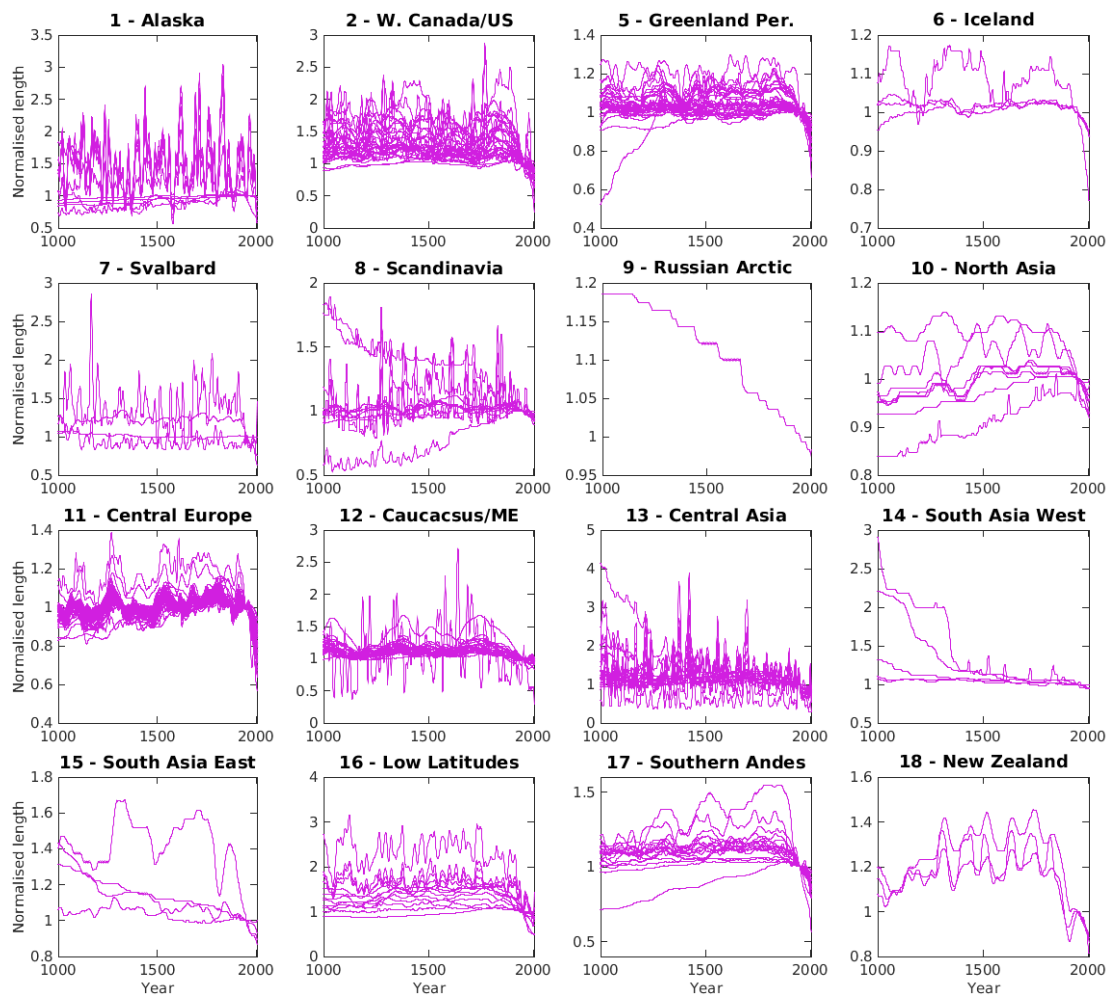

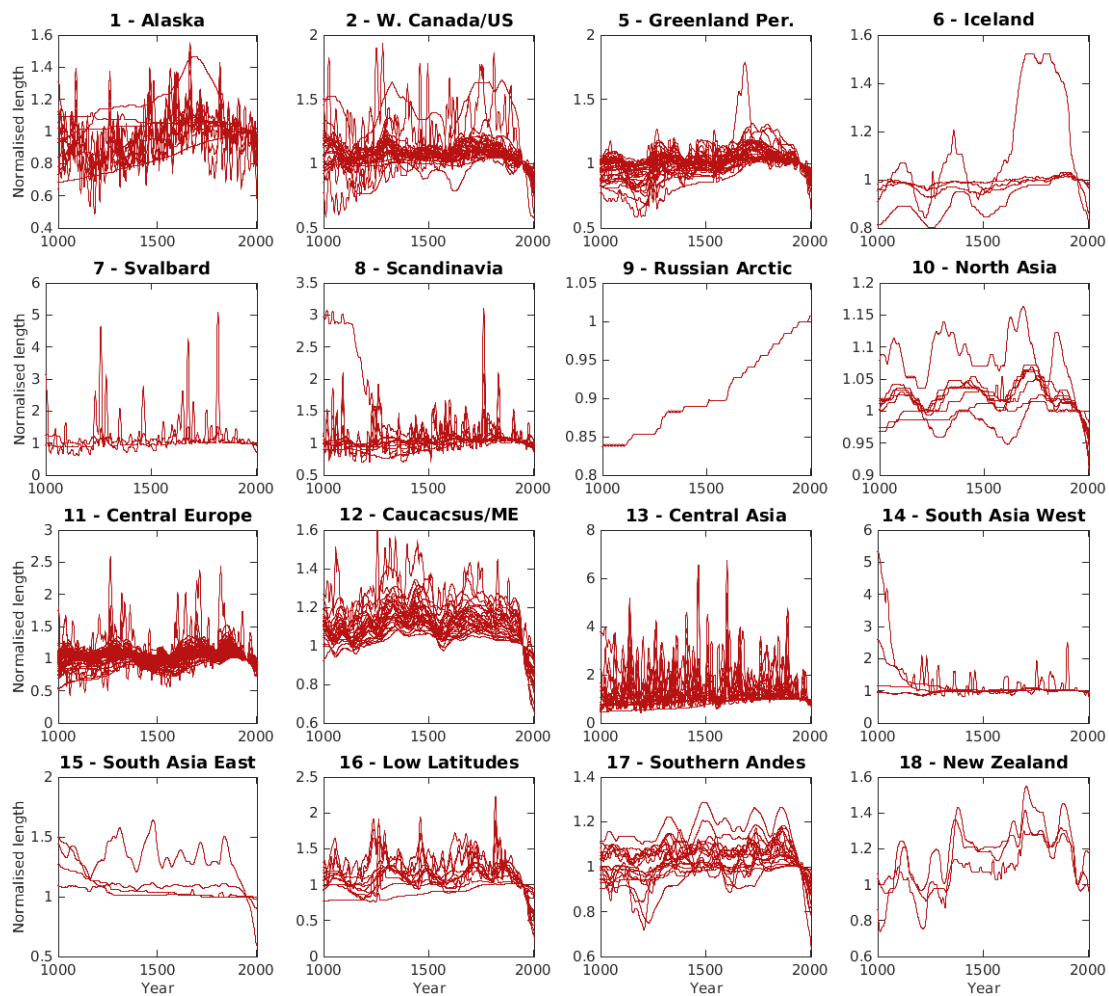

Supplement: Supplementary file 1 [file tc-14-3135-2020-supplement.pdf]
